# Supplementary material
Source: publisher site journal article supplement (https://www.dovepress.com/article/599947)
Supplement: Supplementary file 1 [file 599947%20Revised%20Appendix%201_1_1_1.docx]

**Appendix 1 – Interrater agreement of the coding**

Number of cases coded by two clinicians – 30

Number of cases where the codes by two researchers completely matched – 28

Number of cases where the codes by two researchers did not match – 2

| **Clinician-attenuated diagnosis (from the cohort database)** | **Coder 1** | **Coder 2** | **Explanation of the discrepancy** | **Categorization for analysis after comparing the clinical reference vs. the index coding of the case** |
| --- | --- | --- | --- | --- |
| Surgically repaired tetralogy of Fallot (ToF) with recurrent pulmonary regurgitation | Z87.7, I37.1 | Z87.7 | Coder 2 coded the pulmonary regurgitation as a component of the pathology of ToF. Coder 1 was that the pulmonary regurgitation was a late complication of surgical correction of ToF and should be coded separately | No change (misclassified) |
| Atrial flutter | I48.3 | I48.1 | Atrial flutter was coded incorrectly as atrial fibrillation by Coder 2 | No change (missed) |

**Appendix 2 - Assigning the diagnostic category for cases with multiple coexisting cardiac conditions**

| **Combination of cases** | **Assigned group** |
| --- | --- |
| Dilatation of the aorta associated with a congenital condition | Congenital abnormality |
| Cardiomyopathy with a genetic origin and a congenital abnormality | Congenital abnormality |
| Hypertrophic or dilated cardiomyopathies and arrhythmias | Cardiomyopathy |
| Congenital valvular conditions | Congenital abnormality |
| Congenital abnormality and arrhythmia | Congenital abnormality |
| Congenital abnormality and prosthetic valve/graft/defibrillator | Congenital abnormality |
| Congenital abnormality, prosthetic valve/graft/defibrillator, arrhythmia | Congenital abnormality |
